# Supplementary material
Source: PubMed Central journal article supplement (PMC4435104)

Supplemental Figure S1. Independent Validation of Dex and E<sub>2</sub> Co-Regulated Genes. mRNA expression was determined for RNA Binding Motif Protein 24 (*RBM24*), Alpha-2C Adrenergic Receptor (*ADRA2C*), Mucin 5B (*MUC5B*), Natriuretic Peptide Type C (*NPPC*), Period Homolog 1 (*PER1*), Chromosome 10 Open Reading Frame 10 (*C10orf10*), and Left-Right Determination Factor 1 (*LEFTY1*). Values were normalized to the housekeeping gene Cyclophilin B (*PPIB*). Bar graphs show mean  $\pm$  SEM of four biological replicates. The fold change valued determined by microarray for each gene is listed below each treatment. The symbols \* and \*\* represent groups with means statistically different at  $p < 0.05$  and  $p < 0.01$ , respectively, as determined by ANOVA.

# Sup Fig S1

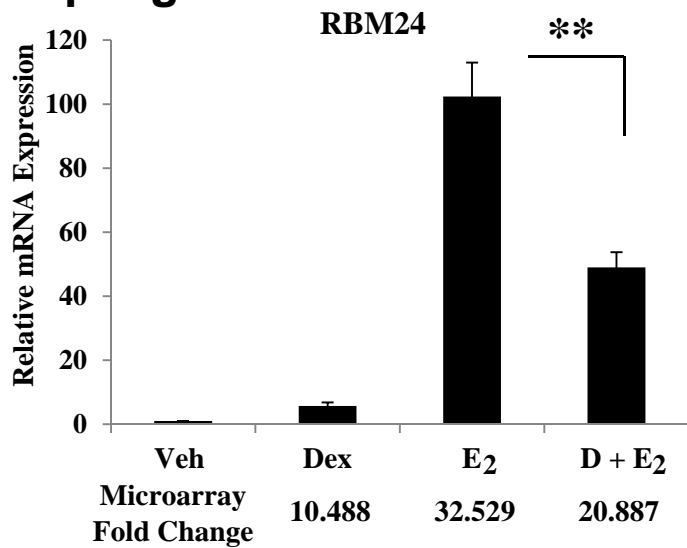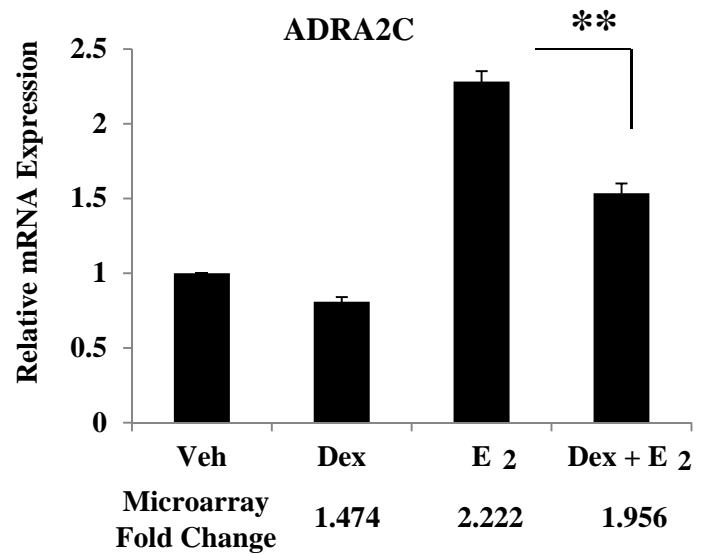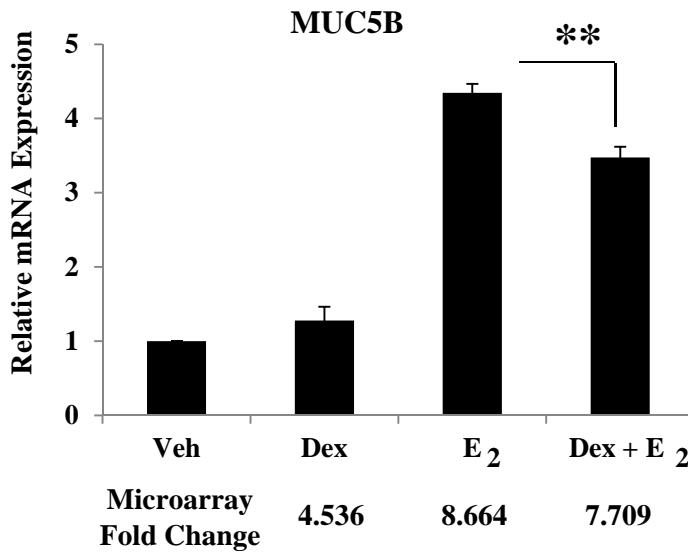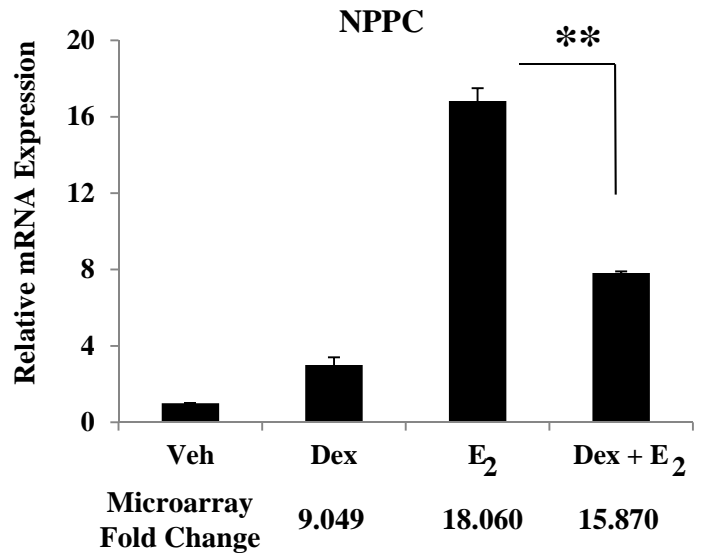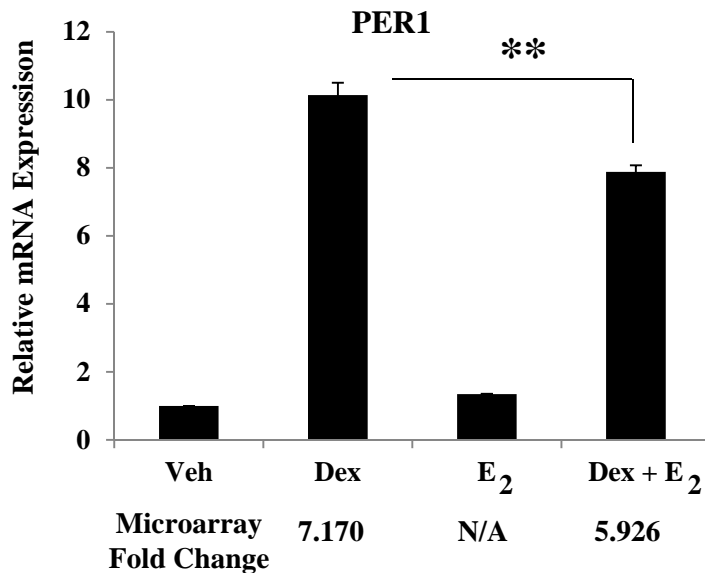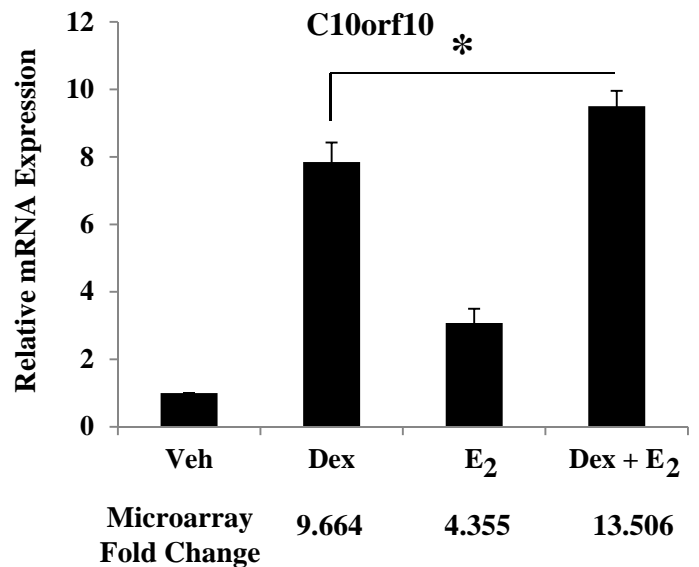

Supplement: supp_113.111054_biolreprod.113.111054-1.pdf [file supp_113.111054_biolreprod.113.111054-1.pdf]
